# Supplementary material for: The leverage effect of the relative strength of molecular solvophobicity vs. solvophilicity on fine-tuning nanomorphologies of perylene diimide bolaamphiphiles
Source: Royal Society of Chemistry journal article supplement (doi:10.1039/c2sm27674g), 2013-01-01
Supplement: c2sm27674g.pdf [file c2sm27674g.pdf]

## Supporting Information

# The Leverage Effect of the Relative Strength of Molecular Solvophobicity vs Solvophilicity on Fine-Tuning Nano-Morphologies of Perylene Diimide Bola-Amphiphiles

Zhigang Zhang<sup>a,∇</sup>, Xin Zhang<sup>a,∇</sup>, Chuanlang Zhan<sup>a,\*</sup>, Zhenhuan Lu<sup>a</sup>, Xunlei Ding<sup>b</sup>, Shenggui He<sup>b</sup>, and Jiannian Yao<sup>a,\*</sup>

<sup>a</sup>Beijing National Laboratory of Molecular Science, CAS Key Laboratory of Photochemistry, Institute of Chemistry, Chinese Academy of Sciences, Beijing, 100190, PR China. Fax: (+86)-10-82616517; E-mail: (C.Z.) clzhan@iccas.ac.cn, (J.Y.) jnyao@iccas.ac.cn.

<sup>b</sup>Beijing National Laboratory for Molecular Sciences, State Key Laboratory for Structural Chemistry of Unstable and Stable Species, Institute of Chemistry, Chinese Academy of Sciences, Beijing, 100190, PR China.

<sup>∇</sup> These authors do the same contributions to this work.

### 1. Instruments and methods

The UV-visible absorption spectra were measured with a Shimadzu UV-1601PC double-beam spectrophotometer. All spectroscopic measurements were carried out at room temperature. Fluorescence spectra were measured using F-4500 (Hitachi). For the measurements of absorption spectra, we used an ultrathin quartz cell with a typical optical length of 0.2 mm. And the fluorescence spectra were measured using a normal quartz cell with an optical length of 1 cm and a reflection measurement along the 45° direction relative to the excitation light direction was used to eliminate re-absorbing phenomena from high concentrations. The SEM pictures were recorded with a field emission scanning electron microscope (FESEM, Hitachi S-4800), operating at an accelerating voltage of 1.5 kV. The TEM measurements were performed on a Tecnai G2 20 S-TWIN electron microscope, operating at an accelerating voltage of 200 kV. The WXR D measurements were performed by using a X-ray powder diffraction (XRD, BRUKER D8 Focus) with Cu K $\alpha$  as the radiation source ( $\lambda = 1.5418 \text{ \AA}$ ) and operated at 40 kV and 40 mA.

### 2. Samples preparation

Firstly, a DCM solution with [PDI]= $1 \times 10^{-2}$  M were prepared. Then, it was diluted into a mixture of DCM and EtOH or DCM and MCH by 10 times to form a dilute solution with a final concentration of PDI of  $1 \times 10^{-3}$  M, in which the final  $R_{\text{EtOH}}$  or  $R_{\text{MCH}}$  was controlled as 0%, 10%, 20%, 30%, 40%, and 50%, 60%, 70%, 80% and 90%, respectively.

### 3. Quantum chemical calculations

Computational details are presented as follows:

Density functional theory (DFT) calculations were performed using the Gaussian 03 program<sup>1</sup> with the B3LYP exchange-correlation function.<sup>2</sup> All-electron triple- $\xi$  valence basis sets with polarization functions (6-311G\*\*) are used for all atoms. Geometry optimizations were performed with full relaxation of all atoms. Calculations were performed in gas phase without solvent effects, and the protonation of bay-pyridyloxyl is simulated by adding one proton to each nitrogen atom in the pyridinium moieties. Vibrational frequency calculations were performed to check that the stable structures had no imaginary frequency. Structures with  $C_i$  symmetry were found to have small imaginary frequency (less than  $10\text{ cm}^{-1}$ ) both before and after protonation, so structures with slightly distorted  $C_i$  symmetry are used in our calculations. The dihedral angle between the two naphthalene moieties is about  $14^\circ$  and change slightly after protonation, while that between the pyridinium and naphthalene moieties is about  $70^\circ$  and is decreased to about  $60^\circ$  after protonation.

#### 4. Concentration-variable absorption spectra of molecule 2 (a) and 3 (b) in DCM.

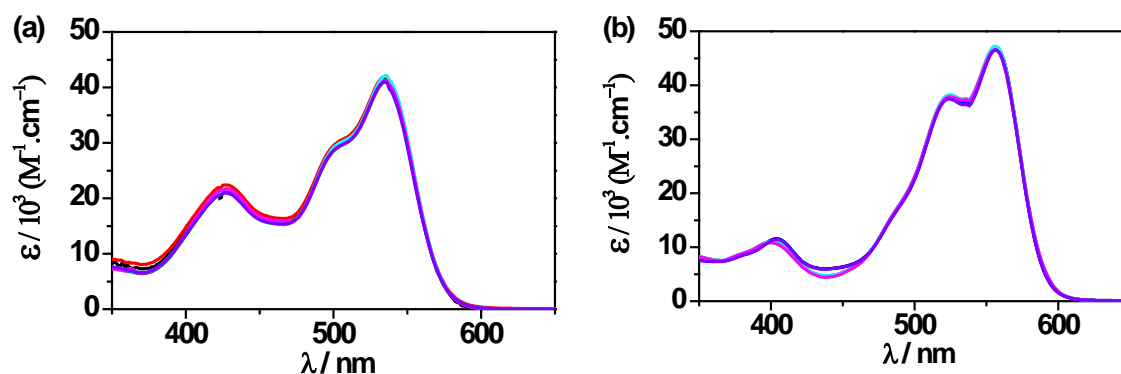

From these absorption spectra with the concentration increasing from  $1 \times 10^{-6}\text{ M}$  to  $1 \times 10^{-3}\text{ M}$ , one can see that there are no obvious aggregation appeared in DCM for these two molecules.

#### References

1. M. J. Frisch, G. W. Trucks, H. B. Schlegel, G. E. Scuseria, M. A. Robb, J. R. Cheeseman, J. A. Montgomery Jr., T. Vreven, K. N. Kudin, J. C. Burant, J. M. Millam, S. S. Iyengar, J. Tomasi, V. Barone, B. Mennucci, M. Cossi, G. Scalmani, N. Rega, G. A. Petersson, H. Nakatsuji, M. Hada, M. Ehara, K. Toyota, R. Fukuda, J. Hasegawa, M. Ishida, T. Nakajima, Y. Honda, O. Kitao, H. Nakai, M. Klene, X. Li, J. E. Knox, H. P. Hratchian, J. B. Cross, V. Bakken, C. Adamo, J. Jaramillo, R. Gomperts, R. E. Stratmann, O. Yazyev, A. J. Austin, R. Cammi, C. Pomelli, J. W. Ochterski, P. Y. Ayala, K. Morokuma, G. A. Voth, P. Salvador, J. J. Dannenberg, V. G. Zakrzewski, S. Dapprich, A. D. Daniels, M. C. Strain, O. Farkas, D. K. Malick, A. D. Rabuck, K. Raghavachari, J. B. Foresman, J. V. Ortiz, Q. Cui, A. G. Baboul, S. Clifford, J. Cioslowski, B. B. Stefanov, G. Liu, A. Liashenko, P. Piskorz, I. Komaromi, R. L. Martin, D. J. Fox, T. Keith, M. A. Al-Laham, C. Y. Peng, A. Nanayakkara, M. Challacombe, P. M. W. Gill, B. Johnson, W. Chen, M. W. Wong, C. Gonzalez, J. A. Pople, Gaussian 03, Revision C.02, Gaussian, Inc., Wallingford CT, 2004.
2. a) C. T. Lee, W. T. Yang, R. G. Parr, *Phys. Rev. B* 1988, **37**, 785-789; (b) A. D. Becke, *J. Chem. Phys.* 1993, **98**, 5648-5652.
3. R. Krishnan, J. S. Binkley, R. Seeger, J. A. Pople, *J. Chem. Phys.* 1980, **72**, 650-654.
